# A genome-wide association study highlights a regulatory role for *IFNG-AS1* contributing to cutaneous leishmaniasis in Brazil

Short title: A GWAS for cutaneous leishmaniasis in Brazil

Léa C. Castellucci<sup>1,2,\*</sup>, Lucas Almeida<sup>1,2,\*</sup>, Svetlana Cherlin<sup>3,\*</sup>, Michaela Fakiola<sup>4</sup>, Edgar Carvalho<sup>1</sup>, Amanda B. Figueiredo<sup>5</sup>, Clara M. Cavalcanti<sup>5</sup>, Natalia S. Alves<sup>5</sup>, Walderez O. Dutra<sup>1,6</sup>, Kenneth J. Gollob<sup>1,5,7</sup>, Heather J. Cordell<sup>3</sup>, and Jenefer M. Blackwell<sup>8,9</sup>

\*Equal contributions

<sup>1</sup>National Institute of Science and Technology in Tropical Diseases, Brazil;

<sup>2</sup>Federal University of Bahia, Salvador, Brazil;

<sup>3</sup>Population Health Sciences Institute, Newcastle University, UK;

<sup>4</sup>INGM-National Institute of Molecular Genetics "Romeo ed Enrica Invernizzi" Milan, Milan, Italy;

<sup>5</sup>International Center for Research, AC Camargo Cancer Center, São Paulo, Brazil;

<sup>6</sup>Instituto de Ciências Biológicas, Universidade Federal de Minas Gerais, Belo Horizonte, Brazil;

<sup>7</sup>Núcleo de Ensino e Pesquisa, Instituto Mario Penna, Belo Horizonte, Brazil;

<sup>8</sup>Department of Pathology, University of Cambridge, UK;

<sup>9</sup>Telethon Kids Institute, The University of Western Australia, Western Australia

**Corresponding author:** Jenefer M. Blackwell ([jenefer.blackwell@telethonkids.org.au](mailto:jenefer.blackwell@telethonkids.org.au))

**Correspondence to:** Jenefer M. Blackwell, PO Box 855, West Perth, Western Australia 6872; Hospital Avenue, Nedlands, Western Australia 6009; Phone: +61 8 63191000.

**Funding** British Medical Research Council (MRC) MR/N017390/1, FAPEMIG grant in cooperation with MRC/CONFAP (CBB-APQ-00883-16), National Institute of Science and Technology in Tropical Diseases, Brazil (N° 573839/2008–5), CNPq (K.J.G. and W.O.D. are CNPq fellows), FAPESP (Fellowships for N.S.Alves and A.B. Figueiredo), and NIH Grant AI 30639. HJC and SC were supported by the Wellcome Trust (grant number 102858/Z/13/Z).

## Competing interests

The authors disclose no conflicts of interest. The study sponsor had no role in study design, data collection, data analysis, data interpretation, or writing of the report. The corresponding author had full access to all study data and had final responsibility for the decision to submit for publication.

## Abstract

**Background.** Cutaneous leishmaniasis (CL) caused by *Leishmania braziliensis* remains an important public health problem in Brazil. The goal of this study was to identify genetic risk factors for CL.

**Methods.** Genome-wide analysis was undertaken using DNAs from 956 CL cases and 868 controls (phase 1) and 1110 CL cases and 1178 controls (phase 2) genotyped using Illumina HumanCoreExome BeadChips. Imputation against 1000G data provided 4,498,586 quality-controlled single nucleotide variants (SNVs) common across phase 1 and phase 2 samples. Linear mixed models in FastLMM were used to take account of genetic diversity/ethnicity/admixture. Cellular cytokines were measured using flow cytometry.

**Results.** Combined analysis across cohorts found no associations that achieved genome-wide significance, commonly accepted as  $P < 5 \times 10^{-8}$ . Support for variants at wound-healing genes previously studied as candidate genes for CL included *SMAD2* (rs115582038/rs75753347;  $P_{\text{imputed\_1000G}} = 1.47 \times 10^{-4}$ ). Top novel GWAS hits at  $P < 5 \times 10^{-5}$  in plausible candidate genes for CL included *SERPINB10* (rs62097497;  $P_{\text{imputed\_1000G}} = 2.67 \times 10^{-6}$ ), *CRLF3* (rs75270613;  $P_{\text{imputed\_1000G}} = 5.12 \times 10^{-6}$ ), *STX7* (rs144488134;  $P_{\text{imputed\_1000G}} = 6.06 \times 10^{-6}$ ), *KRT80* (rs10783496;  $P_{\text{imputed\_1000G}} = 6.58 \times 10^{-6}$ ), *LAMP3* (rs74285558;  $P_{\text{imputed\_1000G}} = 6.54 \times 10^{-6}$ ) and *IFNG-AS1* (rs4913269;  $P_{\text{imputed\_1000G}} = 1.32 \times 10^{-5}$ ). Of these, *LAMP3* ( $P_{\text{adjusted}} = 9.25 \times 10^{-12}$ ; +6-fold), *STX7* ( $P_{\text{adjusted}} = 7.62 \times 10^{-3}$ ; +1.3-fold) and *CRLF3* ( $P_{\text{adjusted}} = 9.19 \times 10^{-9}$ ; +1.97-fold) were all expressed more highly in CL biopsies compared to normal skin, whereas expression of *KRT80* ( $P_{\text{adjusted}} = 3.07 \times 10^{-8}$ ; -3-fold) was lower. Notably, the percent peripheral blood CD3<sup>+</sup> T cells making interferon- $\gamma$  in response to *Leishmania* antigen differed significantly by *IFNG-AS1* genotype.

**Conclusions.** In addition to supporting variants in wound-healing genes as genetic risk factors for CL, our GWAS results provide important novel leads to understanding

pathogenesis of CL including through the regulation of interferon- $\gamma$  responses. (245 words;  
250 allowed)

## INTRODUCTION

American cutaneous leishmaniasis (ACL) caused by *Leishmania braziliensis* is associated with a variety of clinical presentations including cutaneous leishmaniasis (CL), mucosal leishmaniasis (ML), and disseminated leishmaniasis (DL). ML and DL are generally preceded by CL. CL is the most common form of disease and is associated with localized skin lesions, mainly ulcers, on exposed parts of the body. Whilst normally self-limiting, the degree of pathology and the rate of healing varies, and the lesions leave life-long scars. Not all individuals infected with *Leishmania* parasites go on to develop clinical disease. Subclinical infection is usually associated with a *Leishmania*-specific cellular immune response, measured traditionally as a positive delayed type hypersensitivity or Montenegro skin test responses *in vivo* [1, 2]. Stimulation of peripheral blood lymphocytes with *Leishmania* antigen also results in production of interferon- $\gamma$  (IFN- $\gamma$ ) and tumour necrosis factor (TNF) in individuals with subclinical infection, but at a lower level than observed with clinical CL [2]. In a longitudinal cohort study, IFN- $\gamma$  production, mainly by natural killer cells, was associated with protection, but a positive *Leishmania*-specific skin-test response did not prevent development of disease [3]. Indeed, a positive *Leishmania*-specific skin-test response has high sensitivity for the diagnosis of CL caused by *L. braziliensis* [1, 2, 4]. Immunologically, the different forms of ACL are generally associated with exaggerated cellular immune responses. In CL, there is a direct correlation between the frequency of CD4<sup>+</sup> T cells expressing IFN $\gamma$  and TNF and the size of ulcer [5], while levels of these pro-inflammatory cytokines are higher in ML than CL [6]. The outcome of *L. braziliensis* infection appears to be determined by a fine balance between the pro-inflammatory cytokines IFN $\gamma$  and TNF and anti-inflammatory interleukin-10 (IL-10) [4, 6, 7].

A major interest has been in determining the extent to which host genetic factors determine these responses. Racial differences, familial clustering and studies in mice all

support host genetic control of *Leishmania* infections (reviewed [8-11]). Human family-based genetic epidemiology studies of CL disease caused by the related *L. peruviana* pathogen were consistent with a gene by environment multifactorial model, with a two-locus model of inheritance providing the best fit to the data [12]. This suggested that major genetic risk factors might readily be found for CL. To date, candidate gene studies [13-21] undertaken in *L. braziliensis* endemic regions have demonstrated putative roles for polymorphisms at multiple genes associated with pro- and anti-inflammatory responses (*TNFA*, *SLC11A1*, *CXCR1*, *IL6*, *IL10*, *CCL2/MCP1*) and with wound healing (*FLII*, *CTGF*, *TGFBR2*, *SMAD2*, *SMAD3*, *SMAD7*, *COL1A1*) in determining susceptibility to CL or ML disease. This includes susceptibility genes identified from murine studies of leishmaniasis (*SLC11A1*, *FLII*) [15, 16]. Although frequently underpinned by functional data [17-19] and/or supported by prior immunological studies [22-26], these studies have generally lacked statistical power.

Here we set out to perform a well-powered genome-wide association study for CL caused by *L. braziliensis*. A robust approach incorporating discovery and replication phases was employed using a total sample size across two cohorts that exceeded 2000 CL cases and 2000 controls. No genes/regions achieved genome-wide significance (commonly accepted as  $P < 5 \times 10^{-8}$  [27-29]) in a combined analysis. Support was found for the prior hypothesis [14, 21] that variants at wound-healing genes are risk factors for CL, including at *SMAD2*, *SMAD3* and *SMAD 7* studied previously and novel associations at *SMAD1*, *SMAD4*, *SMAD6*, *SMAD9*, *TGFBR3*, *COL11A1* and *COL24A1*. Top novel GWAS hits at  $P < 5 \times 10^{-5}$  that provide plausible candidate genetic risk factors for CL included variants at *SERPINB10*, *CRLF3*, *STX7*, *LAMP3*, *KRT80* and *IFNG-ASI*. Notable amongst these is the association at *IFNG-ASI* encoding IFNG antisense RNA 1, a role for which is further supported here by functional data showing that the percent of peripheral blood CD3<sup>+</sup> T cells making IFN- $\gamma$  or TNF in

response to *Leishmania* antigen stimulation differs significantly by *IFNG-AS1* genotype.

Given the important role of this long non-coding RNA (lncRNA) in determining expression of the gene *IFNG* encoding IFN- $\gamma$  [30], our results provide an important novel lead to understanding pathogenesis of CL through the regulation of IFN- $\gamma$  responses.

## **METHODS**

### **Ethical Considerations, Sampling and Clinical Data Collection**

The study was undertaken with approval by the ethical committee of the Hospital Universitário Professor Edgard Santos, Salvador, Brazil (numbers 018/2008 and 22/2012) and the Brazilian National Ethical Committee (CONEP – 305/2007 and CONEP – 1258513.1.000.5537). The enrolment of human subjects complies with the principles laid down in the Helsinki declaration. All participants or their parents/guardians signed written consents to participate in the study and for the storage of de-identified genotype data. Post-quality control (QC) (carried forward below) genotype data will be lodged in the European Genome-phenome Archive upon publication with access controlled through a study-specific Data Access Committee. CL cases and endemic controls were collected from a region of rural rain forest, Corte de Pedra, Bahia, Brazil, where *L. braziliensis* is endemic. Sample collection was based on ascertainment of cases of CL at the Corte de Pedra Public Health Post. Endemic controls were recruited from attendants of cases at the clinic and/or by active follow-up in the field. Collection of cases and controls was undertaken in two phases: phase 1 between March 2008 and April 2010; phase 2 between January 2016 and July 2017. Blood bank controls were volunteer blood bank donors at the HEMOBA Foundation in the city of Salvador collected between the years 2015 and 2017. Basic demographic data (age, sex) were recorded for all participants. Blood (8 ml) was taken by venipuncture and collected into

dodecyl citrate acid (DCA)-containing vacutainers (Becton Dickinson). Genomic DNA was prepared using the proteinase K and salting-out method [31]. DNAs were shipped to UK for genotyping at Cambridge Genomic Services, Department of Pathology, University of Cambridge, UK.

### **Array Genotyping and Marker QC**

DNAs were genotyped on Illumina Infinium® HumanCoreExome Beadchip (Illumina Inc., San Diego, CA, USA), which includes probes for 551,004 single nucleotide variants (SNVs), 282,373 of which are genome-wide tag SNVs that represent core content and are highly informative across ancestries, and 268,631 SNVs that are exome-focused markers. All genotyping data and reference panels were analysed using human genome build 37 (hg19). Individuals were excluded if they had a missing data rate >5%. SNVs were excluded if they had genotype missingness >5%, minor allele frequency (MAF) <0.01, or if they deviated from Hardy-Weinberg equilibrium (HWE; threshold of  $P < 1.0 \times 10^{-8}$ ). This provided a post-QC dataset of 312,503 genotyped SNVs for the 956 CL cases and 868 controls in the phase 1 sample, and 298,919 genotyped SNVs for the 1110 CL cases and 1178 controls in the phase 2 sample. The phase 1 and phase 2 samples had 52% and 81% power, respectively, and the combined sample 99% power, to detect genome wide significance ( $P < 5 \times 10^{-8}$ ) for genetic effects with a disease allele frequency of 0.25, effect size (genotype relative risk) of 1.5, and assuming a disease prevalence of 2%.

### **SNV Imputation and GWAS**

Imputation of missing and non-assayed genetic variants was performed using the 1000 Genomes Project phase 3 reference panel [32], which contains 84.8 million variants for 2504 samples from 26 populations throughout Africa, America, East Asia, Europe and South-East

Asia. The 293,563 post-QC array variants genotyped in common across phase 1 and phase 2 samples were phased and imputed using the Michigan Imputation Server v1.0.4 [33]. We excluded imputed SNVs with an information metric  $<0.8$  or genotype probability  $<0.9$ , and the remaining variants were converted to genotype calls and filtered for  $<5\%$  missingness and  $MAF > 0.005$ . Imputation accuracy was assessed using the  $r^2$  metric ( $r^2 > 0.5$ ), which represents the squared Pearson correlation between the imputed SNV dosage and the known allele dosage.

Genome-wide association analysis for the CL phenotype was performed using a linear mixed model as implemented in FaST-LMM v2.07, which takes account of both relatedness and population substructure and generally assumes an additive model of inheritance [34]. Population structure and relatedness were controlled using the genetic similarity matrix, computed from 32,696 Phase 1 and 45,569 Phase 2 LD-pruned array variants, and any systematic confounding assessed using quantile-quantile (Q-Q) plots and a test statistic inflation factor (denoted  $\lambda$ ) calculated in R version 2.15.0 by dividing the median of the observed chi-squared statistics by the median of the theoretical chi-squared distribution. Genome-wide significance was set at  $P \leq 5 \times 10^{-8}$  [27-29]. Manhattan plots were generated using the `mhplot()` function of 'gap', a genetic analysis package used in R version 3.4.3. Regional plots of association were created using LocusZoom [35] in which  $-\log_{10}(P\text{-values})$  were graphed against their chromosomal location. The 32,696 Phase 1 and 45,569 Phase 2 LD-pruned array variants were matched to data from HapMap populations and PCA plots prepared in R.

### **Expression analysis**

We examined RNA expression for genes of interest using data from a published microarray study [36] that compared skin biopsies from CL patients from our study area with biopsies of



normal skin from non-endemic unexposed donors (accessed from the GEO database: GSE55664). Between group comparisons were made on log transformed data using the GEO2R tool within the GEO database, with P-values adjusted using the Benjamini and Hochberg false discovery rate.

### **Antigen-stimulated T cell responses**

Peripheral blood mononuclear cells were available for a subset of CL patients used in the present study affording us the opportunity to determine whether antigen stimulated T cell responses differed by *IFNG-AS1* genotype. PBMC from previously untreated cutaneous leishmaniasis patients were obtained from heparinized blood by centrifugation over Ficoll. Cells were stimulated at  $1 \times 10^6$  cells/ml with 10  $\mu\text{g}/\text{mL}$  soluble Leishmania antigen (SLA) plus 1  $\mu\text{g}/\text{mL}$  purified NA/LE anti-human CD28 (clone CD28.2, BD Biosciences, San Jose, CA, USA) at  $37^\circ\text{C}$  / 5%  $\text{CO}_2$  for 15 h and subsequently incubated in the presence of brefeldin A (BD Biosciences) at  $37^\circ\text{C}$  with 5%  $\text{CO}_2$  for up to 4 h. Cells were washed and resuspended in PBS/0.2% BSA for incubation with BUV661 anti-human CD3 monoclonal antibody (UCHT1 clone, BD Biosciences) at  $4^\circ\text{C}$  for 30 min in the dark. Cells were fixed, washed, and permeabilized using BD Cytofix/Cytoperm kit before incubation with BV605 anti-human IFN-gamma (B27 clone) and BUV395 anti-human TNF-alfa (MAB11 clone, BD Biosciences) in permeabilization buffer at  $4^\circ\text{C}$  for 30 min in the dark. Live and dead cells were distinguished using Fixable Viability Stain 575V (BD Biosciences). The samples were acquired in BD FACSymphony A5 flow cytometer and data analysis was performed using FlowJo 10.6.1 software (BD Biosciences). Differences in responses between genotypes were evaluated in GraphPad Prism using non-parametric Kruskal-Wallis ANOVA with multiple comparisons.

## RESULTS

### Characteristics of the Study Population

Basic demographic information (age, sex) for study participants is shown in Table S1. Cases and controls were well-matched for age and sex overall, the younger age of endemic controls counterbalanced by the older age of blood bank controls. Given ethnic admixture of Brazilian populations it was of interest initially to compare genetic heterogeneity between CL cases and controls, and between the two sources of endemic versus blood bank control samples. PCA plots (Figure 1) show that blood bank controls were generally well matched to endemic controls, with all controls well-matched to cases. There were a small number of outliers in the discovery endemic controls, which also showed greater genetic heterogeneity in the replication sample compared to blood bank controls and cases. Comparison against HapMap populations (Figure 2) showed predominant admixture between Caucasian and African ethnicities in both phase 1 (Figure 2A) and phase 2 (Figure 2B) samples. Linear mixed models were used in association analyses to take account of genetic heterogeneity.

### Genome-wide Association Study

The GWAS was performed in two phases. Manhattan plots for genotyped data for phase 1 and phase 2 are shown in Figure S1. Quantile-quantile plots (Figure S2) of the observed versus expected  $-\log_{10}$  P-values did not show any evidence for systematic bias in either phase 1 or phase 2, with inflation factors  $\lambda$  of 0.998 and 1, respectively. A Manhattan plot for the combined analysis of imputed genotype data is shown in Figure 3. The top hits did not achieve genome-wide significance, commonly accepted as  $P < 5 \times 10^{-8}$  for GWAS using variants with minor allele frequencies  $> 1\%$  [27-29].

### Interrogating the GWAS Data in Relation to Previous Candidate Gene Studies

As noted above, previous candidate gene studies attempting to identify genetic risk factors for CL caused by *L. braziliensis* have typically been small, underpowered family-based or case-control studies [13-21]. We therefore interrogated the GWAS data to determine whether evidence could be found to support the candidacy of these genes. Table S2 presents the top hits for previously studied candidate, or functionally related, genes. Given *a priori* evidence to look at these genes, we used  $P < 0.01$  as a cut-off to identify possible associations. No variants were associated at  $P < 0.01$  for *TNFA*, *SLC11A1*, *CXCR1*, *IL6*, *IL10*, *CCL2/MCP1*, *FLII*, *CTGF*, *COL1A1*, or *TGFBR2*. Associations were observed for variants at *SMAD2*, *SMAD3* and *SMAD7* (Table S2), wound healing genes that had previously been shown to be associated with CL [14]. The strongest signal was at *SMAD2*, as indicated by the peak of association at multiple variants observed on the LocusZoom plot across the region (Figure 4A). Associations at *SMAD3* and *SMAD7* (Table S2; see also Figure 4A LocusZoom plot that includes *SMAD7*) were less well-supported. Some evidence for associations at related SMADs was also observed (Table S2), specifically at *SMAD1*, *SMAD4* (see also Figure 4A), *SMAD6* and *SMAD9*. The major role for SMAD proteins is to transduce signals from receptors of the transforming growth factor beta (TGF $\beta$ ) superfamily. Although no association at  $P < 0.01$  was observed at *TGFBR2*, association (Table S2) at the functionally related gene *TGFBR3* (Figure 4B) was supported at multiple variants across the gene. Similarly, associations (Table S2) observed at collagen genes, *COL24A1* (Figure 4C) and *COL11A1* (Figure 4D), functionally related to wound healing gene *COL1A1* were supported at multiple variants across each gene. Associations were also observed (Table S2) for variants at genes (*IL6R* and *IL10R*) encoding receptors for cytokines IL-6 and IL-10 that have previously been shown to be genetically and/or functionally associated with cutaneous forms of disease caused by *L. braziliensis* [17, 18].

## Candidate Top Hits from the GWAS Data

Table S3 provides a full list of hits that were suggestive of association, using a cut-off  $P < 5 \times 10^{-5}$ . Table 1, Figure 5 and Figure S3 highlight those hits that are of potential functional relevance to CL. Of specific interest are genes, *LAMP3* (Figure 5A) and *STX7* (Figure 5B), that play a role in lysosome function. *LAMP3* encodes lysosomal associated membrane protein 3, also known as dendritic cell LAMP or DCLAMP. *STX7* encodes Syntaxin 7, which plays a role in the ordered fusion of endosomes and lysosomes with phagosomes. Other genes, *KRT80* (Figure 5C) and *CRLF3* (Figure S1A), may relate to perturbations in skin at the site of infection, while *SERPINB10* (Figure S1B) and *IFNG-AS1* (Figure 5D) are highlighted in relation to more central roles in determining immune responses. Other hits at  $P < 5 \times 10^{-5}$  are shown in Table S3. Whilst variants in these regions may be true CL susceptibility loci, there is currently no obvious support for their candidacy related to their functions.

## Expression Analysis of Novel Candidate Genes Arising from the GWAS

Disease associated SNVs identified through GWAS mostly localize to non-coding sequence [37] and are enriched for expression quantitative trait loci [38, 39]. An initial piece of evidence to support candidacy of variants identified in our GWAS was to determine (a) if they were expressed in skin and/or lesions, and (b) whether their expression in CL lesions was up- or down-regulated relative to expression in normal skin. We therefore interrogated previously published [36] microarray data that had compared RNA from lesions biopsies with RNA from normal skin biopsies (Figure S4). This showed that *LAMP3* ( $P_{\text{adjusted}} = 9.25 \times 10^{-12}$ ; +6-fold increase in lesions compared to normal skin), *STX7* ( $P_{\text{adjusted}} = 7.62 \times 10^{-3}$ ; +1.3-fold) and *CRLF3* ( $P_{\text{adjusted}} = 9.19 \times 10^{-9}$ ; +1.97-fold) were all up-regulated in CL biopsies, whereas expression of *KRT80* ( $P_{\text{adjusted}} = 3.07 \times 10^{-8}$ ; -3-fold) was down-regulated. Individual variation

in expression levels of these genes in lesions from different donors suggests that some additional level of regulated gene expression may exist. *SERPINB10* was expressed at very low levels in both normal and lesion biopsy samples. Probes for *IFNG-AS1* were not present on the chips used in the published microarray data [36]. Since *IFNG-AS1* expression is known to influence IFN- $\gamma$  production [30], we therefore sought functional support for this gene by examining the percent of antigen-stimulated T cells producing IFN- $\gamma$  by *IFNG-AS1* genotypes (Figure 6). A significant difference across genotypes was observed at rs4913269 (ANOVA  $P_{\text{adjusted}}=0.044$ ), with individuals homozygous for the disease-associated G allele showing a significantly lower percentage of IFN- $\gamma$  producing T cells compared to heterozygous individuals (Figure 6A). A similar observation was made for the percentage of T cells producing TNF (Figure 6B; ANOVA  $P_{\text{adjusted}}=0.021$ ), which was strongly correlated with the percentage of IFN- $\gamma$  producing T cells (Figure 6C;  $r^2=0.31$ ,  $P=0.0003$ ). Parallel observations were made for the second top SNP rs11177004 (Figure 6D-F), and for 5 other SNPs in strong linkage disequilibrium (Figure 5D) with these two top hits (data not shown).

## DISCUSSION

Results of the GWAS presented here provide the first hypothesis-free insights into genetic risk factors for CL caused by *L. braziliensis*. Despite prior evidence for genetic regulation of *Leishmania* infections [8-12], and the well-powered phase 1 and phase 2 study undertaken here, no signals of association achieved genome-wide significance generally accepted as  $5 \times 10^{-8}$  for this type of GWAS [27-29]. Nevertheless, interesting novel genetic risk factors were supported by interrogating suggestive associations that achieved  $P < 5 \times 10^{-5}$ , and modest support ( $P < 0.01$ ) was obtained for some previously studied candidate genes for CL.

In relation to previous candidate gene studies, the concept of a role for wound healing genes in contributing to CL [14, 20] was supported by associations at SMAD genes, with the

strongest support observed for variants at *SMAD2*. SMAD proteins transduce signals from receptors of the TGF $\beta$  superfamily. Although we did not replicate our earlier study [14] showing a genetic association with the type II receptor for TGF $\beta$  encoded by *TGFBR2*, we did see a positive association at *TGFBR3* encoding the type III receptor. TGFBR3 is a membrane proteoglycan [40] that often functions as a co-receptor with other TGF $\beta$  receptor superfamily members [41]. Shedding of the ectodomain also produces soluble TGFBR3 which may inhibit TGF $\beta$  signalling [40]. TGF $\beta$  has long been known to play an important role in tissue fibrosis [42], with abnormal TGF $\beta$  regulation and function implicated in a large number (reviewed [43]) of fibrotic and inflammatory pathologies. CL lesions are characterised by a combination of inflammatory immune processes and fibrosis [44]. The fibrotic reaction leads to increased production of extracellular matrix proteins including collagens, as well as the activation of local fibroblasts to differentiate into myofibroblasts [45]. TGF $\beta$  stimulates COL11A1 expression in dermal fibroblasts [46], while novel myofibroblast-specific expression of COL24A1 is a signature of skin wounds [47]. Together with associations at *IL6R* and *IL10R*, our GWAS results support the complex interplay between fibrotic and inflammatory processes in determining pathologies associated with CL caused by *L. braziliensis*.

The benefit of using an unbiased genome-wide approach to identification of genetic risk factors for disease is its ability to highlight novel genes/pathways involved in disease pathogenesis. Two genetic associations were identified which related to intracellular localization of *Leishmania* parasite in phagolysosomes [48, 49], namely the associations at *LAMP3* and *STX7*. *LAMP3* encodes lysosomal associated membrane protein 3, also known as dendritic cell LAMP or DCLAMP [50]. Expression of DCLAMP increases markedly upon activation of dendritic cells where it localizes to the MHC Class II compartment immediately before the translocation of MHC Class II molecules to the cell surface [50].

LAMP3 was expressed at much higher levels in RNA from lesion biopsies compared to normal skin, supporting a role for this gene in contributing to disease susceptibility. Since dendritic cells are the most potent antigen-presenting cells that induce primary T-cell responses, it is likely that the influence of variants at *LAMP3* will be related to the processing and presentation of *Leishmania* antigens to T cells. *STX7*, on the other hand, encodes syntaxin 7 which influences vesicle trafficking to lysosomes, including phagosome-lysosome fusion [51]. Variants at this gene are therefore likely to be influencing the delivery of *Leishmania* phagosomes to the lysosomal compartment of host macrophages. *STX7* was expressed in normal skin with a modest increase in expression in lesion biopsies, again supporting a possible role for this gene in contributing to disease pathology.

Other genes identified included *KRT80* and *CRLF3* that may relate to perturbations in the skin at the site of infection and/or in the wound healing response. Keratin 80 encoded by *KRT80* is a type II epithelial keratin that is an intermediate filament protein responsible for structural integrity of epithelial cells and has biased expression in skin keratinocytes [52]. At the time of infection pathogens invading the skin can cause keratinocytes to produce chemokines which attract monocytes, natural killer cells, T cells, and dendritic cells [53]. Interestingly, *KRT80* and multiple other keratins (*KRT77*, *KRT81*, *KRT4*, *KRT39*, *KRT32*, *KRT33B*; data not shown) were expressed at much lower levels in lesion biopsies compared to normal skin. To what extent this represents a paucity of keratinocytes in lesions, as opposed to specific down regulation of gene expression in keratinocytes within lesions, will require further investigation. Keratinocytes are known to play an important role in wound healing [45], are potent producers of IL10 and TGF $\beta$  [54], and have been shown to change to a sclerotic phenotype by gene silencing of *Fli1* [55]. Although association of human CL and *FLII* [14, 15] was not replicated here, *Fli1* is a confirmed CL susceptibility gene in mice [56]. Hence, our novel associations also continue to focus on molecules and cells involved in

wound healing. *CRLF3*, on the other hand, encodes a member of the cytokine receptor-like factor 3 family which is expressed in normal skin, but shows pathologically enhanced expression in premalignant actinic keratosis and malignant squamous cell carcinoma [57]. Further work will be required to determine if *CRLF3* is similarly dysregulated in CL lesions.

Two further genes, *SERPINB10* and *IFNG-ASI*, are highlighted in relation to more central roles in determining immune responses. Serpin family B member 10 encoded by *SERPINB10* is a peptidase inhibitor expressed in bone marrow [58] in haematopoietic cells of the monocytic lineage [59] and is known to inhibit TNF-induced apoptosis [60]. Epithelial *SERPINB10* contributes to allergic eosinophilic inflammation [61], suggesting additional roles for this molecule in immunopathology. However, we found no evidence for expression of *SERPINB10* in normal skin or in lesion biopsies, suggesting that a role in determining susceptibility to CL must be at the level of central regulation of haematopoiesis and/or immune responses. *IFNG* antisense RNA 1 encoded by *IFNG-ASI* has been shown to fine-tune the magnitude of IFN- $\gamma$  responses [30]. It is expressed in both mouse and human T helper1 cells and positively regulates *Ifng* expression [62, 63]. Transient over-expression of *Ifng-as1* in mice is associated with increased IFN- $\gamma$  and reduced susceptibility to *Salmonella enterica* [62]. Conversely, deletion of *Ifng-as1* in mice compromises host defence against *Toxoplasma gondii* infection by reducing *Ifng* expression. Discordant expression of *IFNG* and *IFNG-ASI* is seen in long-lasting memory T cells, where high expression of *IFNG-ASI* was associated with low *IFNG* suggesting that there may be feedback inhibition [30]. Here we observed that *IFNG-ASI* genotype was associated with downstream effects on both the percentage of IFN- $\gamma$ -producing CD3<sup>+</sup> T cells and the highly correlated percentage of TNF-producing CD3<sup>+</sup> T cells following stimulation of peripheral blood mononuclear cells with *Leishmania*-derived antigens. In particular, individuals who were homozygous for the disease-associated allele at each of the top 7 *IFNG-ASI* associated SNVs had significantly



lower percentages of IFN- $\gamma$  and TNF producing T cells, suggesting that lower IFN- $\gamma$  and TNF production regulated by *IFNG-ASI* is associated with increased disease risk. Our results indicate that regulatory variants at *IFNG-ASI* may act as risk factors for CL by modulating production of these two pro-inflammatory cytokines known to be important in activating macrophages for anti-leishmanial activity.

## CONCLUSIONS

In conclusion, while not achieving genome-wide significance at any loci, our GWAS has provided further support for variants in wound-healing genes as genetic risk factors for CL as well as providing important novel leads to understanding pathogenesis of CL including through the regulation of IFN- $\gamma$  responses.

## Notes

**Acknowledgements.** We would like to thank the staff of the Health Post at Corte de Pedra for their assistance in the collection of samples and clinical and field data, as well as staff at the HEMOBA Foundation Blood Bank in Salvador.

**Disclaimer.** The study sponsor had no role in study design, data collection, data analysis, data interpretation, or writing of the report. The corresponding author had full access to all study data and had final responsibility for the decision to submit for publication.

**Financial support.** This work was supported by: the British Medical Research Council (MRC) grant number MR/N017390/1; a Brazilian FAPEMIG grant in cooperation with MRC/CONFAP (CBB-APQ-00883-16), National Institute of Science and Technology in Tropical Diseases, Brazil (N<sup>o</sup> 573839/2008–5), CNPq (K.J.G. and W.O.D. are CNPq fellows), FAPESP (Fellowships for N.S.A. and A.B.F.); the National Institute of Science and Technology in Tropical Diseases, Brazil (N<sup>o</sup> 573839/2008–5); and the National Institute of

Health NIH Grant AI 30639. HJC and SC were supported by the Wellcome Trust (grant number 102858/Z/13/Z).

***Potential conflicts of interest.*** All authors: No reported conflicts of interest. All authors have submitted the ICMJE Form for Disclosure of Potential Conflicts of Interest. Conflicts that the editors consider relevant to the content of the manuscript have been disclosed.

## Figure Legends

**Figure 1.** PCA plots comparing genetic heterogeneity across cases and controls used in the study. (A) and (C) compare endemic control (ND) against blood bank controls (HBA) for Phase 1 and Phase 2 samples, respectively. (B) and (D) compare all cases against all controls for Phase 1 and Phase 2 samples, respectively.

**Figure 2.** PCA plots comparing genetic heterogeneity in the study sample against HapMap control populations. (A) shows the plot for all Phase 1 samples; (B) shows the plot for all Phase 2 samples. Abbreviations for HapMap populations: ASW - Americans of African Ancestry in SW US; CEU - Utah Residents (CEPH) with Northern and Western European Ancestry; CHB - Han Chinese in Beijing, China; JPT - Japanese in Tokyo, Japan; CHD - Chinese in Metropolitan Denver, Colorado; GIH - Gujarati Indian from Houston, Texas; LWK - Luhya in Webuye, Kenya; MEX - Mexican ancestry in Los Angeles, California; MKK - Maasai in Kinyawa, Kenya; TSI - Toscani in Italia; YRI - Yoruba in Ibadan, Nigeria.

**Figure 3.** Manhattan plot of results from the combined analysis for the 4.46M high-quality 1000G imputed SNV variants common to Phase 1 and Phase 2 samples. Data are for analysis in FastLMM looking for association between SNVs and CL. The Y-axis indicates  $-\log_{10} P$  values for association, the X axis indicates the positions across each chromosome.

**Figure 4.** LocusZoom plot of single-nucleotide variant (SNV) associations with CL across regions of chromosomes containing genes previously associated with, or functionally related to, CL in candidate genes studies. The  $-\log_{10} P$  values (left y-axis) are shown in the top section of the plot. Dots representing individual SNVs are color coded (see key) based on

their population-specific linkage disequilibrium  $r^2$  with the top SNV (annotated by rs ID) in the region. The right Y-axis is for recombination rate (blue line), based on HapMap data. The bottom section of each plot shows the positions of genes across the region. The genes of interest include (A) *SMAD2*, *SMAD7* and *SMAD4* (for clarity, 14 genes are omitted from the bottom section of this plot; association at *DYM* is listed in Table S1); (B) *TGFBR3*; (C) *COL24A1*; and (D) *COL11A1*.

**Figure 5.** LocusZoom plot of single-nucleotide variant (SNV) associations across regions of chromosomes containing genes associated with CL at  $P < 5 \times 10^{-5}$  in this study. The  $-\log_{10} P$  values (left y-axis) are shown in the top section of each plot. Dots representing individual SNVs are color coded (see key) based on their population-specific linkage disequilibrium  $r^2$  with the top SNV (annotated by rs ID) in the region. The right Y-axis is for recombination rate (blue line), based on HapMap data. The bottom section of each plot shows the positions of genes across the region. The genes of interest include (A) *LAMP3*; (B) *STX7*; (C) *KRT80*; and (D) *IFNG-ASI*. Plots for two other regions containing genes of specific interest, *CRLF3* and *SERPINB10*, are provided in Figure S3.

**Figure 6.** Plots showing differences in percentages of antigen-stimulated IFN- $\gamma$  and TNF producing CD3<sup>+</sup> T cells by *IFNG-ASI* genotype. Plots (A), (B) and (C) show results by genotype for the top SNV rs4913269 at Chromosome 12 bp position 68407845, (D), (E) and (F) for the second top SNV rs11177004 at Chromosome 12 bp position 68409009 (Build 37). (A) and (D) show the percent IFN- $\gamma^+$  CD3<sup>+</sup> T cells by genotype; (B) and (E) the percent TNF<sup>+</sup> CD3<sup>+</sup> T cells by genotype, and (C) and (F) show the correlation between percent IFN- $\gamma^+$  and percent TNF<sup>+</sup> CD3<sup>+</sup> T cells for individuals genotyped.

## Supplementary figure legends.

**Figure S1.** Manhattan plots of results of association analyses for genotyped SNVs. (A) for Phase 1. (B) for Phase 2. Data are for analysis in FastLMM looking for association between SNVs and CL. The Y-axis indicates  $-\log_{10} P$  values for association, the X axis indicates the positions across each chromosome.

**Figure S2.** Quantile-quantile plot of GWAS p-values for genotyped data for (A) Phase 1; and (B) Phase 2 of the study.

**Figure S3.** Regional association plots (LocusZoom) of the signal for CL association in the regions of (A) *CRLF3* on Chromosome 17; and (B) *SERPINB10* on Chromosome 18. The  $-\log_{10} P$ -values are shown on the upper part of each plot. Dots representing individual SNVs are color coded (see key) based on their population-specific linkage disequilibrium  $r^2$  with the top SNV (annotated by rs ID) in the region. The right Y-axis is for recombination rate (blue line), based on HapMap data. The bottom section of each plot shows the positions of genes across the region.

**Figure S4.** Expression of novel candidate genes derived from the GWAS data in RNA from biopsies of normal skin from healthy donors compared to biopsies from lesions of CL patients. Data were accessed from the GEO database: GSE55664. Between group comparisons (normal versus lesions) were made on log transformed data using the GEO2R tool within the GEO database, with P-values adjusted using the Benjamini and Hochberg false discovery rate.

**Table 1. Top GWAS Hits in Genes of Plausible Functional Interest as Genetic Risk Factors for CL Caused by *L. braziliensis***

| Chr | Position (bp) | rsID        | P-value  | Odds Ratio (95% CI) | Beta (SE)      | Allele <sup>1</sup> | Variant Origin | Location | Gene      | Function                                |
|-----|---------------|-------------|----------|---------------------|----------------|---------------------|----------------|----------|-----------|-----------------------------------------|
| 3   | 182857261     | rs74285558  | 6.54E-06 | 0.87 (0.82-0.92)    | -0.034 (0.008) | A (C/A)             | Global         | intron   | LAMP3     | Lysosomal associated membrane protein 3 |
| 6   | 132815562     | rs144488134 | 6.10E-06 | 0.82 (0.75-0.89)    | -0.034 (0.007) | A (C/A)             | African        | intron   | STX7      | Syntaxin 7                              |
| 12  | 52590004      | rs10783496  | 6.58E-06 | 1.06 (1.03-1.09)    | 0.035 (0.008)  | A (G/A)             | Global         | intron   | KRT80     | Keratin 80                              |
| 12  | 68407845      | rs4913269   | 1.32E-05 | 1.06 (1.03-1.08)    | 0.033 (0.008)  | G (C/G)             | Global         | intron   | IFNG-AS1  | IFNG antisense RNA 1                    |
| 17  | 29136126      | rs75270613  | 5.12E-06 | 0.83 (0.77-0.90)    | -0.034 (0.008) | A (C/A)             | African        | intron   | CRLF3     | Cytokine receptor like factor 3         |
| 18  | 61598763      | rs8084306   | 1.56E-06 | 1.07 (1.04-1.10)    | 0.038 (0.008)  | C (T/C)             | Global         | intron   | SERPINB10 | Serpin family B member 10               |

**NOTE** Details of all top hits at  $P < 5 \times 10^{-5}$  are provided in Table S1. <sup>1</sup>Associated allele (ancestral/minor) for risk or protection as indicated by the odds ratio.

## References

1. Llanos Cuentas EA, Cuba CC, Barreto AC, Marsden PD. Clinical characteristics of human *Leishmania braziliensis* infections. *TransRSocTropMedHyg* **1984**; 78:845-6.
2. Follador I, Araujo C, Bacellar O, et al. Epidemiologic and immunologic findings for the subclinical form of *Leishmania braziliensis* infection. *Clin Infect Dis* **2002**; 34:E54-E8.
3. Muniz AC, Bacellar O, Lago EL, et al. Immunologic Markers of Protection in *Leishmania* (Viannia) *braziliensis* Infection: A 5-Year Cohort Study. *JInfectDis* **2016**; 214:570-6.
4. Gomes-Silva A, de Cassia Bittar R, Dos Santos Nogueira R, et al. Can interferon-gamma and interleukin-10 balance be associated with severity of human *Leishmania* (Viannia) *braziliensis* infection? *ClinExpImmunol* **2007**; 149:440-4.
5. Antonelli LR, Dutra WO, Almeida RP, Bacellar O, Carvalho EM, Gollob KJ. Activated inflammatory T cells correlate with lesion size in human cutaneous leishmaniasis. *Immunol Lett* **2005**; 101:226-30.
6. Oliveira WN, Ribeiro LE, Schrieffer A, Machado P, Carvalho EM, Bacellar O. The role of inflammatory and anti-inflammatory cytokines in the pathogenesis of human tegumentary leishmaniasis. *Cytokine* **2014**; 66:127-32.
7. Faria DR, Gollob KJ, Barbosa J, Jr., et al. Decreased in situ expression of interleukin-10 receptor is correlated with the exacerbated inflammatory and cytotoxic responses observed in mucosal leishmaniasis. *Infect Immun* **2005**; 73:7853-9.
8. Blackwell JM, Fakiola M, Ibrahim ME, et al. Genetics and visceral leishmaniasis: of mice and man. *Parasite Immunol* **2009**; 31:254-66.
9. El-Safi S, Kheir MM, Bucheton B, et al. Genes and environment in susceptibility to visceral leishmaniasis. *C R Biol* **2006**; 329:863-70.
10. Sakthianandeswaren A, Foote SJ, Handman E. The role of host genetics in leishmaniasis. *Trends Parasitol* **2009**; 25:383-91.
11. Lipoldova M, Demant P. Genetic susceptibility to infectious disease: lessons from mouse models of leishmaniasis. *Nat Rev Genet* **2006**; 7:294-305.
12. Shaw MA, Davies CR, Llanos-Cuentas EA, Collins A. Human genetic susceptibility and infection with *Leishmania peruviana*. *AmJHumGenet* **1995**; 57:1159-68.
13. Cabrera M, Shaw M-A, Sharples C, et al. Polymorphism in TNF genes associated with mucocutaneous leishmaniasis. *JExpMed* **1995**; 182:1259-64.
14. Castellucci L, Jamieson SE, Almeida L, et al. Wound healing genes and susceptibility to cutaneous leishmaniasis in Brazil. *Infect Genet Evol* **2012**; 12:1102-10.
15. Castellucci L, Jamieson SE, Miller EN, et al. FLI1 polymorphism affects susceptibility to cutaneous leishmaniasis in Brazil. *Genes Immun* **2011**; 12:589-94.
16. Castellucci L, Jamieson SE, Miller EN, et al. CXCR1 and SLC11A1 polymorphisms affect susceptibility to cutaneous leishmaniasis in Brazil: a case-control and family-based study. *BMC Med Genet* **2010**; 11:10.
17. Castellucci L, Menezes E, Oliveira J, et al. IL6 -174 G/C promoter polymorphism influences susceptibility to mucosal but not localized cutaneous leishmaniasis in Brazil. *J Infect Dis* **2006**; 194:519-27.
18. Salhi A, Rodrigues V, Jr., Santoro F, et al. Immunological and genetic evidence for a crucial role of IL-10 in cutaneous lesions in humans infected with *Leishmania braziliensis*. *J Immunol* **2008**; 180:6139-48.
19. Ramasawmy R, Menezes E, Magalhaes A, et al. The -2518bp promoter polymorphism at CCL2/MCP1 influences susceptibility to mucosal but not localized cutaneous leishmaniasis in Brazil. *Infect Genet Evol* **2010**; 10:607-13.
20. Castellucci LC, Almeida LF, Jamieson SE, Fakiola M, Carvalho EM, Blackwell JM. Host genetic factors in American cutaneous leishmaniasis: a critical appraisal of studies conducted in an endemic area of Brazil. *Mem Inst Oswaldo Cruz* **2014**; 109:279-88.

21. Almeida L, Oliveira J, Guimaraes LH, Carvalho EM, Blackwell JM, Castellucci L. Wound healing genes and susceptibility to cutaneous leishmaniasis in Brazil: role of COL1A1. *Infect Genet Evol* **2015**; 30:225-9.
22. Castes M, Trujillo D, Rojas ME, et al. Serum levels of tumor necrosis factor in patients with American cutaneous leishmaniasis. *Biol Res* **1993**; 26:233-8.
23. Lessa HA, Machado P, Lima F, et al. Successful treatment of refractory mucosal leishmaniasis with pentoxifylline plus antimony. *Am J Trop Med Hyg* **2001**; 65:87-9.
24. Bacellar O, Lessa H, Schriefer A, et al. Up-regulation of Th1-type responses in mucosal leishmaniasis patients. *Infect Immun* **2002**; 70:6734-40.
25. D'Oliveira A, Jr., Machado P, Bacellar O, Cheng LH, Almeida RP, Carvalho EM. Evaluation of IFN-gamma and TNF-alpha as immunological markers of clinical outcome in cutaneous leishmaniasis. *Rev Soc Bras Med Trop* **2002**; 35:7-10.
26. Faria DR, Gollob KJ, Barbosa JJ, et al. Decreased in situ expression of interleukin-10 receptor is correlated with the exacerbated inflammatory and cytotoxic responses observed in mucosal leishmaniasis. *Infect Immun* **2005**; 73:7853-9.
27. Dudbridge F, Gusnanto A. Estimation of significance thresholds for genomewide association scans. *Genet Epidemiol* **2008**; 32:227-34.
28. Fadista J, Manning AK, Florez JC, Groop L. The (in)famous GWAS P-value threshold revisited and updated for low-frequency variants. *Eur J Hum Genet* **2016**; 24:1202-5.
29. Pe'er I, Yelensky R, Altshuler D, Daly MJ. Estimation of the multiple testing burden for genomewide association studies of nearly all common variants. *Genet Epidemiol* **2008**; 32:381-5.
30. Petermann F, Pekowska A, Johnson CA, et al. The Magnitude of IFN-gamma Responses Is Fine-Tuned by DNA Architecture and the Non-coding Transcript of *Irfng-as1*. *Molecular cell* **2019**; 75:1229-42 e5.
31. Sambrook J, Fritsch EF, Maniatis T. *Molecular Cloning: A Laboratory Manual*. Vol. 2. Cold Spring Harbor, New York: Cold Spring Harbor Laboratory Press, **1989**.
32. Genomes Project C, Auton A, Brooks LD, et al. A global reference for human genetic variation. *Nature* **2015**; 526:68-74.
33. Das S, Forer L, Schonherr S, et al. Next-generation genotype imputation service and methods. *Nat Genet* **2016**; 48:1284-7.
34. Lippert C, Listgarten J, Liu Y, Kadie CM, Davidson RI, Heckerman D. FaST linear mixed models for genome-wide association studies. *Nat Methods* **2011**; 8:833-5.
35. Pruim RJ, Welch RP, Sanna S, et al. LocusZoom: regional visualization of genome-wide association scan results. *Bioinformatics* **2010**; 26:2336-7.
36. Novais FO, Carvalho LP, Passos S, et al. Genomic profiling of human *Leishmania braziliensis* lesions identifies transcriptional modules associated with cutaneous immunopathology. *J Invest Dermatol* **2015**; 135:94-101.
37. Hindorff LA, Sethupathy P, Junkins HA, et al. Potential etiologic and functional implications of genome-wide association loci for human diseases and traits. *Proc Natl Acad Sci U S A* **2009**; 106:9362-7.
38. Croteau-Chonka DC, Rogers AJ, Raj T, et al. Expression Quantitative Trait Loci Information Improves Predictive Modeling of Disease Relevance of Non-Coding Genetic Variation. *PLoS ONE* **2015**; 10:e0140758.
39. Nicolae DL, Gamazon E, Zhang W, Duan S, Dolan ME, Cox NJ. Trait-associated SNPs are more likely to be eQTLs: annotation to enhance discovery from GWAS. *PLoS Genet* **2010**; 6:e1000888.
40. Lopez-Casillas F, Cheifetz S, Doody J, Andres JL, Lane WS, Massague J. Structure and expression of the membrane proteoglycan betaglycan, a component of the TGF-beta receptor system. *Cell* **1991**; 67:785-95.
41. Blobel GC, Schiemann WP, Pepin MC, et al. Functional roles for the cytoplasmic domain of the type III transforming growth factor beta receptor in regulating transforming growth factor beta signaling. *J Biol Chem* **2001**; 276:24627-37.



42. Border WA, Noble NA. Transforming growth factor beta in tissue fibrosis. *N Engl J Med* **1994**; 331:1286-92.
43. Santibanez JF, Quintanilla M, Bernabeu C. TGF-beta/TGF-beta receptor system and its role in physiological and pathological conditions. *Clin Sci (Lond)* **2011**; 121:233-51.
44. Morgado FN, Schubach A, Rosalino CM, et al. Is the in situ inflammatory reaction an important tool to understand the cellular immune response in American tegumentary leishmaniasis? *Br J Dermatol* **2008**; 158:50-8.
45. Ellis S, Lin EJ, Tartar D. Immunology of Wound Healing. *Curr Dermatol Rep* **2018**; 7:350-8.
46. Zhou XD, Xiong MM, Tan FK, Guo XJ, Arnett FC. SPARC, an upstream regulator of connective tissue growth factor in response to transforming growth factor beta stimulation. *Arthritis Rheum* **2006**; 54:3885-9.
47. Bergmeier V, Etich J, Pitzler L, et al. Identification of a myofibroblast-specific expression signature in skin wounds. *Matrix biology : journal of the International Society for Matrix Biology* **2018**; 65:59-74.
48. Chang KP, Dwyer DM. *Leishmania donovani*. Hamster macrophage interactions in vitro: cell entry, intracellular survival, and multiplication of amastigotes. *JExpMed* **1978**; 147:515-30.
49. Alexander J. *Leishmania mexicana*: inhibition and stimulation of phagosome-lysosome fusion in infected macrophages. *Exp Parasitol* **1981**; 52:261-70.
50. de Saint-Vis B, Vincent J, Vandenabeele S, et al. A novel lysosome-associated membrane glycoprotein, DC-LAMP, induced upon DC maturation, is transiently expressed in MHC class II compartment. *Immunity* **1998**; 9:325-36.
51. Wang H, Frelin L, Pevsner J. Human syntaxin 7: a Pep12p/Vps6p homologue implicated in vesicle trafficking to lysosomes. *Gene* **1997**; 199:39-48.
52. Fagerberg L, Hallstrom BM, Oksvold P, et al. Analysis of the human tissue-specific expression by genome-wide integration of transcriptomics and antibody-based proteomics. *Mol Cell Proteomics* **2014**; 13:397-406.
53. Quaresma JAS. Organization of the Skin Immune System and Compartmentalized Immune Responses in Infectious Diseases. *Clin Microbiol Rev* **2019**; 32.
54. Kim WH, An HJ, Kim JY, et al. Apamin inhibits TNF-alpha- and IFN-gamma-induced inflammatory cytokines and chemokines via suppressions of NF-kappaB signaling pathway and STAT in human keratinocytes. *Pharmacol Rep* **2017**; 69:1030-5.
55. Takahashi T, Asano Y, Sugawara K, et al. Epithelial Fli1 deficiency drives systemic autoimmunity and fibrosis: Possible roles in scleroderma. *JExpMed* **2017**; 214:1129-51.
56. Sakthianandeswaren A, Curtis JM, Elso C, et al. Fine mapping of *Leishmania major* susceptibility Locus *Imr2* and evidence of a role for Fli1 in disease and wound healing. *Infect Immun* **2010**; 78:2734-44.
57. Dang C, Gottschling M, Manning K, et al. Identification of dysregulated genes in cutaneous squamous cell carcinoma. *Oncol Rep* **2006**; 16:513-9.
58. Riewald M, Schleef RR. Molecular cloning of bomapin (protease inhibitor 10), a novel human serpin that is expressed specifically in the bone marrow. *J Biol Chem* **1995**; 270:26754-7.
59. Riewald M, Chuang T, Neubauer A, Riess H, Schleef RR. Expression of bomapin, a novel human serpin, in normal/malignant hematopoiesis and in the monocytic cell lines THP-1 and AML-193. *Blood* **1998**; 91:1256-62.
60. Schleef RR, Chuang TL. Protease inhibitor 10 inhibits tumor necrosis factor alpha -induced cell death. Evidence for the formation of intracellular high M(r) protease inhibitor 10-containing complexes. *J Biol Chem* **2000**; 275:26385-9.
61. Mo Y, Zhang K, Feng Y, et al. Epithelial SERPINB10, a novel marker of airway eosinophilia in asthma, contributes to allergic airway inflammation. *Am J Physiol Lung Cell Mol Physiol* **2019**; 316:L245-L54.
62. Gomez JA, Wapinski OL, Yang YW, et al. The NeST long ncRNA controls microbial susceptibility and epigenetic activation of the interferon-gamma locus. *Cell* **2013**; 152:743-54.
63. Collier SP, Collins PL, Williams CL, Boothby MR, Aune TM. Cutting edge: influence of Tmevpg1, a long intergenic noncoding RNA, on the expression of *Ifng* by Th1 cells. *J Immunol* **2012**; 189:2084-8.

**Table S1. Characteristics of the Post-QC Phase 1 and Phase 2 Samples.**

|                   | Phase 1  |                  |                     | Phase 2  |                  |                     |
|-------------------|----------|------------------|---------------------|----------|------------------|---------------------|
|                   | CL cases | Endemic Controls | Blood Bank Controls | CL cases | Endemic Controls | Blood Bank Controls |
| N° participants   | 956      | 237              | 631                 | 1110     | 604              | 574                 |
| Males             | 560      | 89               | 420                 | 659      | 273              | 346                 |
| Females           | 396      | 148              | 211                 | 451      | 331              | 228                 |
| Age at collection |          |                  |                     |          |                  |                     |
| Male Mean±SD      | 29±16    | 24±19            | 35±11               | 31±16    | 18±13            | 37±10               |
| Male Range        | 1-78     | 2-81             | 17-65               | 5-87     | 2-75             | 16-65               |
| Female Mean±SD    | 28±15    | 30±19            | 32±10               | 32±16    | 22±15            | 35±10               |
| Female Range      | 4-75     | 1-88             | 16-68               | 3-85     | 2-72             | 17-65               |

**Table S2. Signals of Association at Candidate and Related Loci Previously Reported as Genetic Risk Factors for CL Caused by *L. braziliensis***

| Chr | Position (bp) | rsID         | P-value  | Odds Ratio (95% CI) | Beta (SE)      | Allele <sup>1</sup> | Variant Origin | Location   | Gene Symbol <sup>2</sup> | Function (Origin of Variant) |
|-----|---------------|--------------|----------|---------------------|----------------|---------------------|----------------|------------|--------------------------|------------------------------|
| 1   | 86264025      | rs380654     | 2.06E-04 | 0.95 (0.93-0.98)    | -0.29 (0.008)  | A (A/C)             | Global         | Intron     | COL24A1                  | Collagen family member 24A1  |
| 1   | 92303128      | rs141665520  | 3.98E-04 | 1.15 (1.07-1.25)    | 0.026 (0.007)  | C (G/C)             | African        | intron     | TGFBR3                   | TGF- $\beta$ receptor 3      |
| 1   | 92306871      | rs77138249   | 3.98E-04 | 1.15 (1.07-1.25)    | 0.026 (0.007)  | C (T/C)             | African        | intron     | TGFBR3                   | TGF- $\beta$ receptor 3      |
| 1   | 103417667     | rs114806195  | 6.22E-04 | 0.90 (0.85-0.96)    | -0.025 (0.007) | T (T/A)             | Global         | intron     | COL11A1                  | Collagen family member 11A1  |
| 1   | 103418632     | rs111420962  | 6.22E-04 | 0.90 (0.85-0.96)    | -0.025 (0.007) | T (A/T)             | Global         | intron     | COL11A1                  | Collagen family member 11A1  |
| 1   | 154428283     | rs12133641   | 7.14E-04 | 0.96 (0.94-0.98)    | -0.027 (0.008) | T (A/T)             | Global         | intron     | IL6R                     | Interleukin 6 receptor       |
| 4   | 146477459     | rs76796874   | 7.49E-04 | 1.15 (1.06-1.24)    | 0.026 (0.008)  | A (G/A)             | African        | intron     | SMAD1                    | R-SMAD <sup>3</sup>          |
| 13  | 37445256      | rs8001427    | 0.004    | 1.13 (1.04-1.23)    | 0.022 (0.008)  | T (A/T)             | African        | Intron     | SMAD9                    | R-SMAD <sup>3</sup>          |
| 15  | 67079073      | rs59361088   | 0.001    | 0.86 (0.79-0.94)    | -0.024 (0.007) | A (C/A)             | African        | downstream | SMAD6                    | I-SMAD <sup>3</sup>          |
| 15  | 67364991      | rs4776880    | 0.009    | 0.96 (0.93-0.99)    | -0.021 (0.008) | T (G/T)             | Global         | intron     | SMAD3                    | R-SMAD <sup>3</sup>          |
| 18  | 45390603      | rs115582038  | 1.47E-04 | 1.19 (1.09-1.30)    | 0.028 (0.007)  | C (G/C)             | African        | intron     | SMAD2                    | R-SMAD <sup>3</sup>          |
| 18  | 45393852      | rs75753347   | 1.47E-04 | 1.19 (1.09-1.30)    | 0.028 (0.007)  | T (A/T)             | African        | intron     | SMAD2                    | R-SMAD <sup>3</sup>          |
| 18  | 46454258      | rs9956511    | 0.005    | 0.86 (0.77-0.95)    | -0.021 (0.008) | C (A/C)             | African        | intron     | SMAD7                    | I-SMAD <sup>3</sup>          |
| 18  | 48562852      | rs78801230   | 6.02E-04 | 1.15 (1.06-1.25)    | 0.026 (0.008)  | T (A/T)             | European       | intron     | SMAD4                    | Co-SMAD <sup>3</sup>         |
| 18  | 48604010      | rs1241993461 | 1.90E-04 | 1.17 (1.08-1.27)    | 0.028 (0.008)  | G (A/G)             | Rare           | intron     | SMAD4                    | Co-SMAD <sup>3</sup>         |
| 21  | 34654499      | rs2247177    | 0.003    | 0.97 (0.95-0.99)    | -0.023 (0.008) | A (G/A)             | Global         | intron     | IL10RB                   | Interleukin 10 receptor B    |

**NOTE** <sup>1</sup>Associated allele (ancestral/minor) for risk or protection as indicated by the odds ratio. <sup>2</sup>Data for two variants provided when the top two hits were in linkage disequilibrium. <sup>3</sup>SMADs are structurally similar proteins that are the main signal transducers for receptors of the transforming growth factor beta (TGF- $\beta$ ) superfamily. The abbreviation derives from homologies to the *Caenorhabditis elegans* SMA ("small" worm phenotype) and *Drosophila* MAD ("Mothers Against Decapentaplegic") family of genes. R-SMAD = receptor-regulated SMAD; Co-SMAD = common partner SMAD; I-SMAD = inhibitory SMAD.

Figure 1

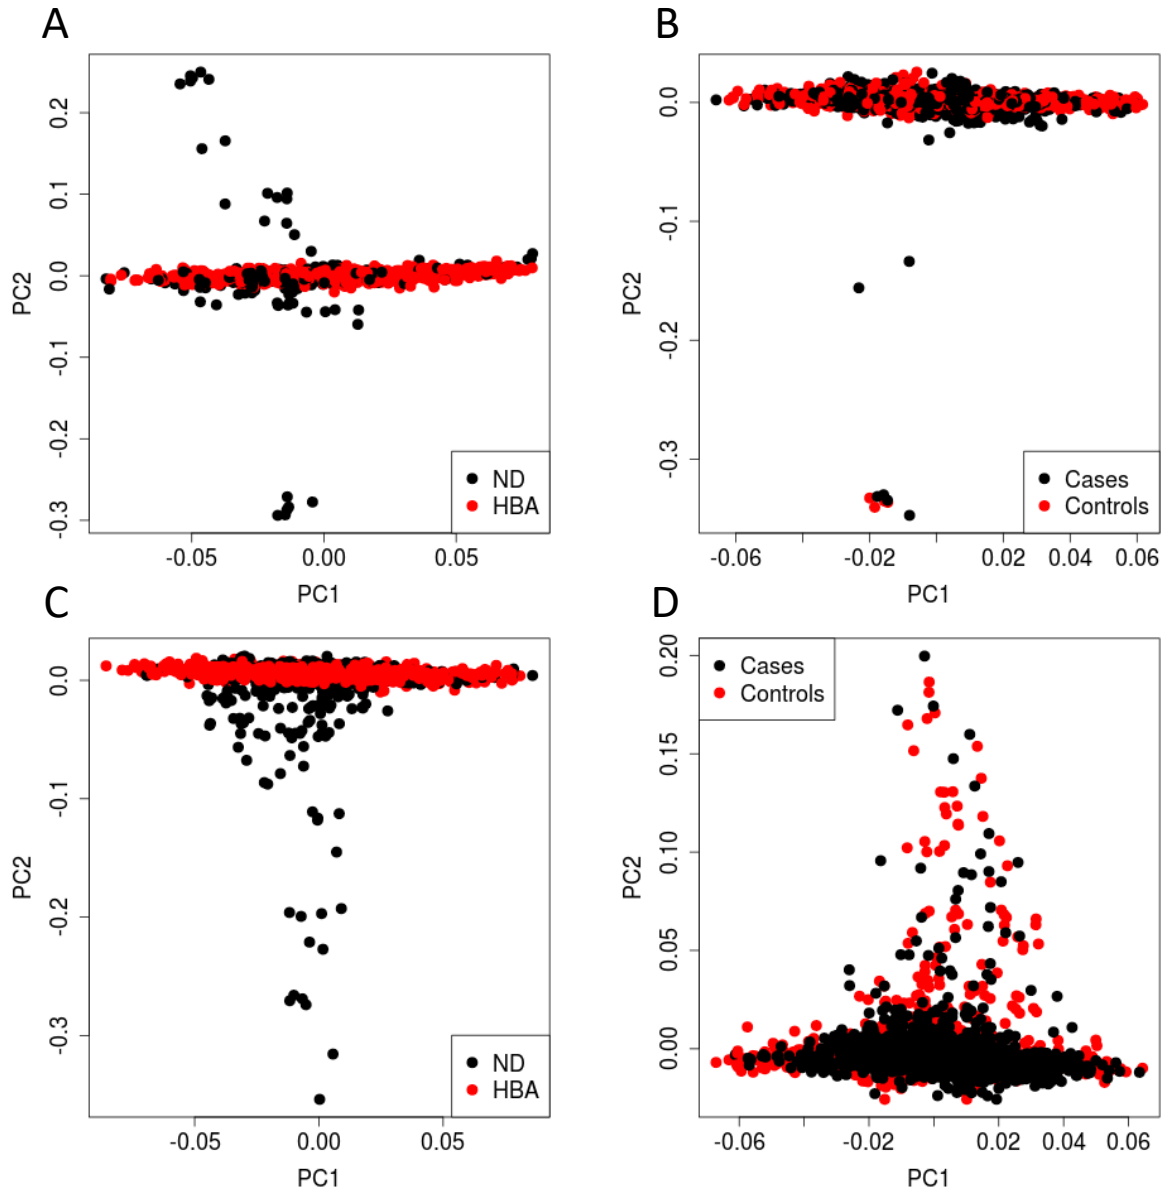

Figure 2

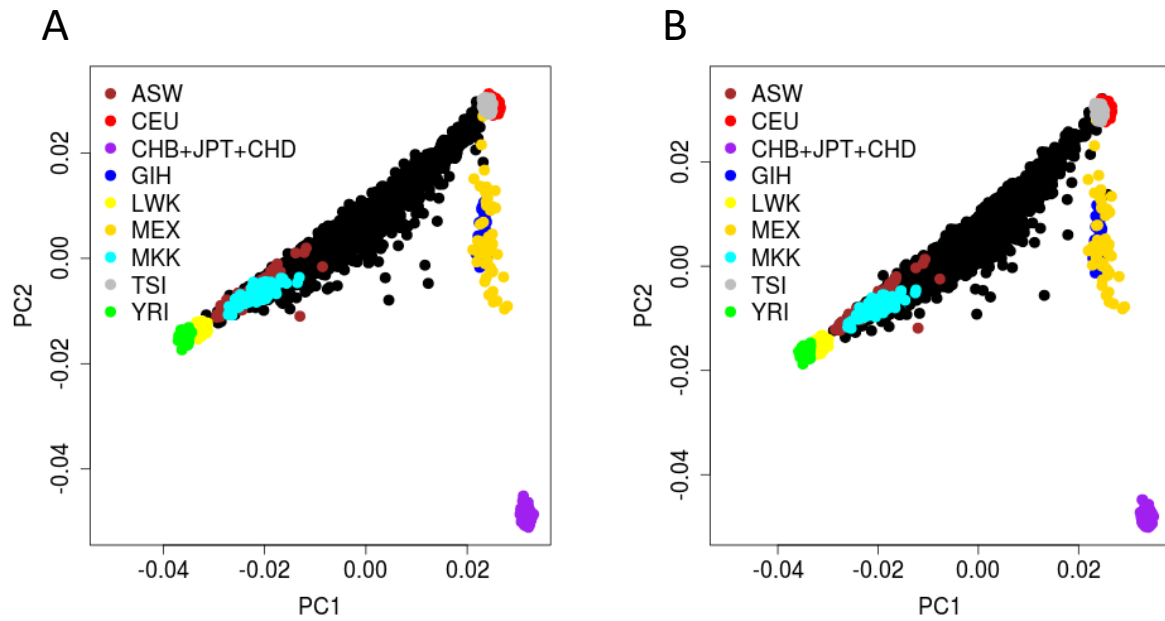

Figure 3

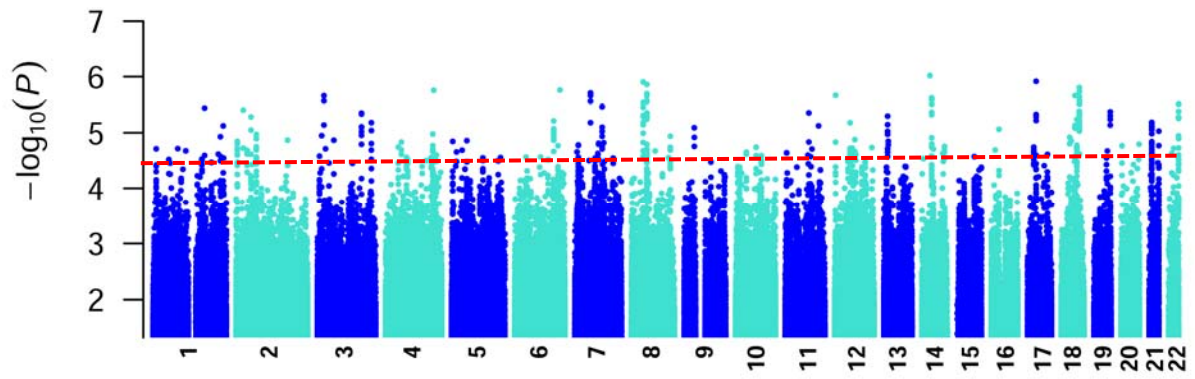

Figure 4

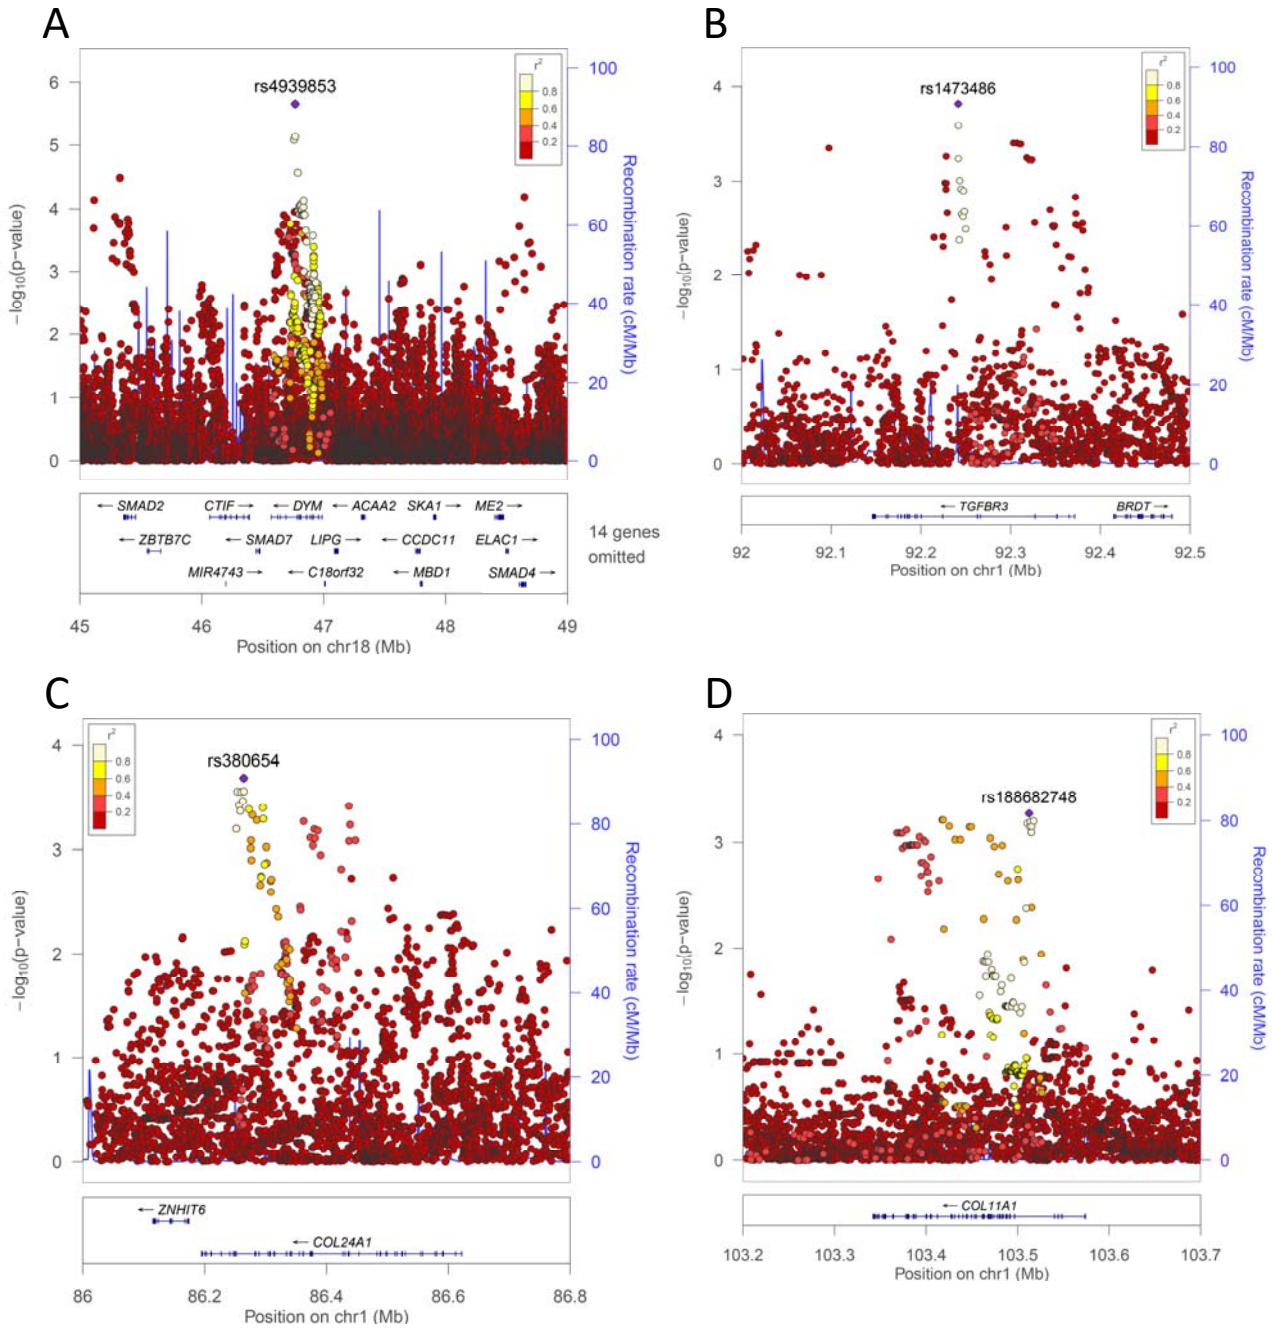



Figure 5

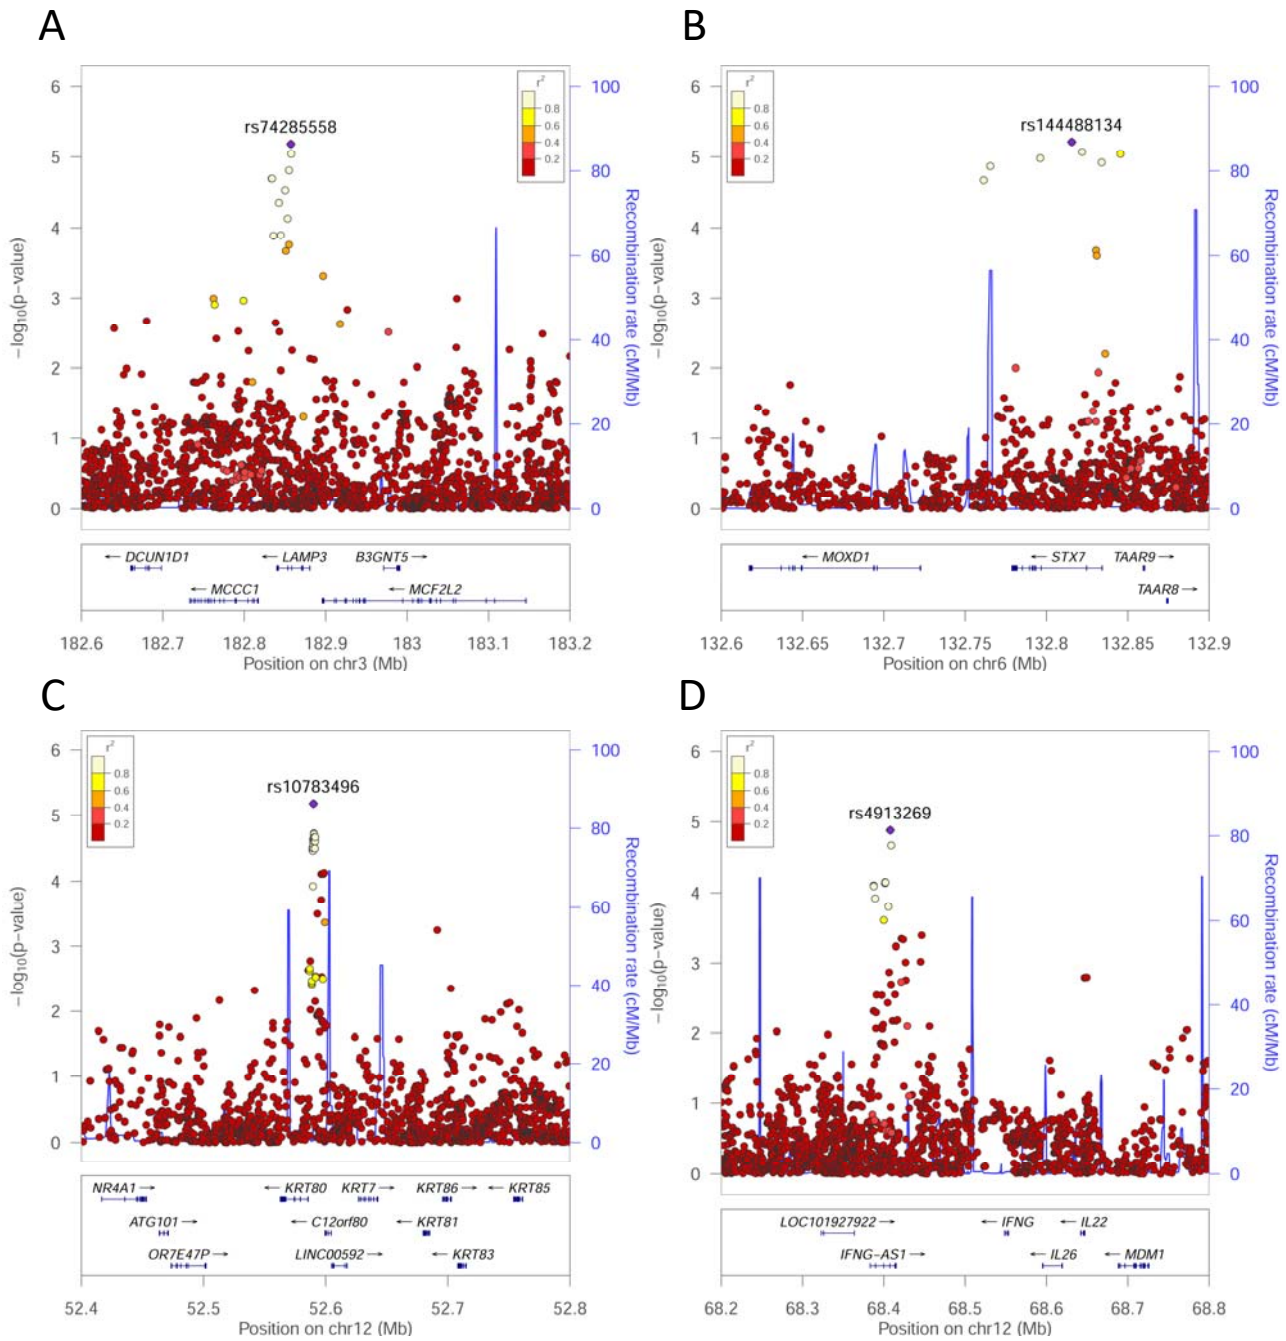



Figure 6

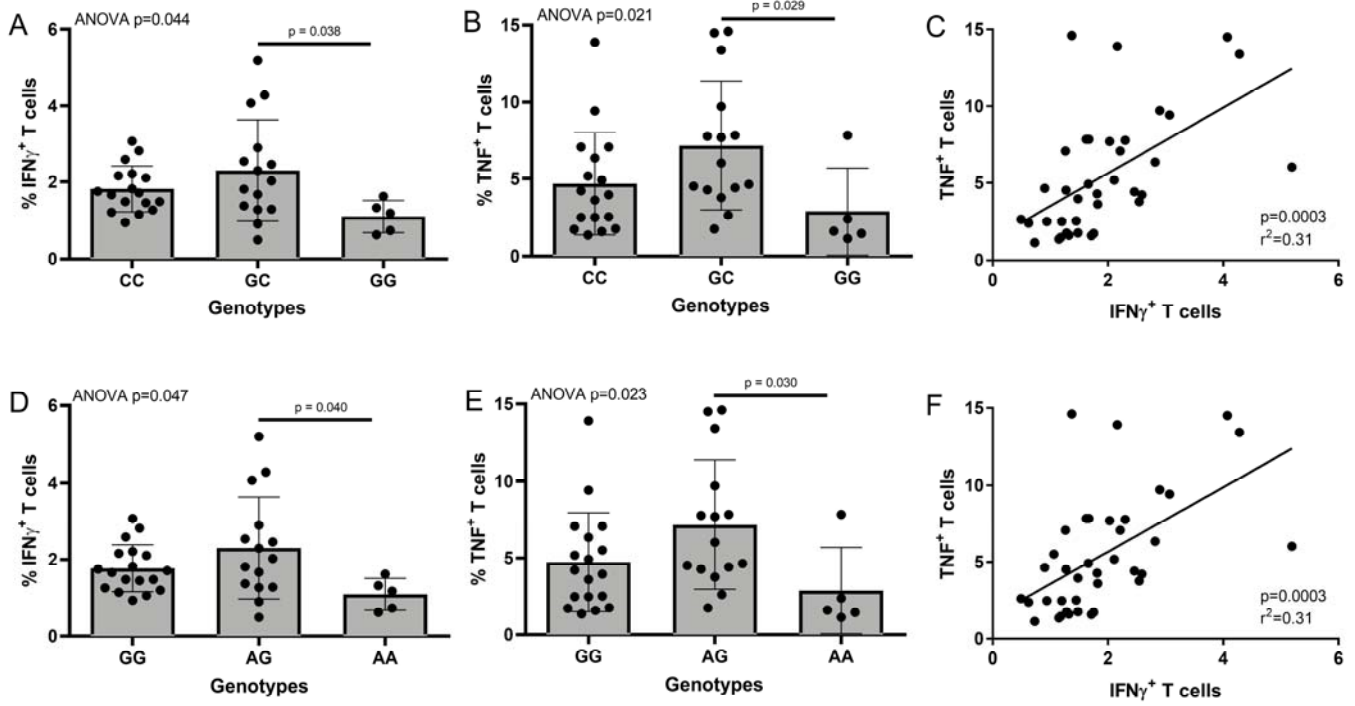

## Figure S1

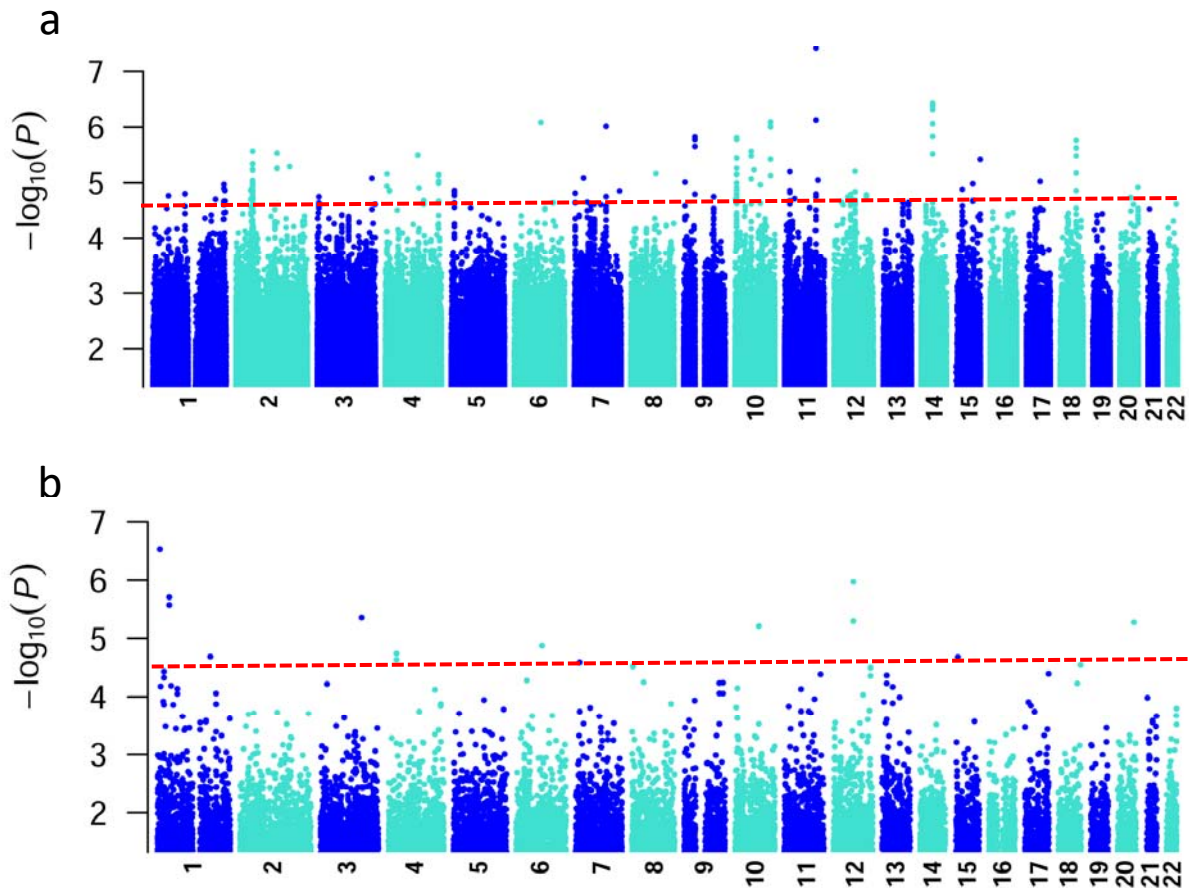

**Figure S1.** Manhattan plots of results of association analyses for genotyped SNVs. (A) for Phase 1. (B) for Phase 2. Data are for analysis in FastLMM looking for association between SNVs and CL. The Y-axis indicates  $-\log_{10} P$  values for association, the X axis indicates the positions across each chromosome. The red dotted lines indicate the  $P=5 \times 10^{-5}$  cut-off used to look for suggestive associations in the combined analysis (main Fig. 3).

## Figure S2

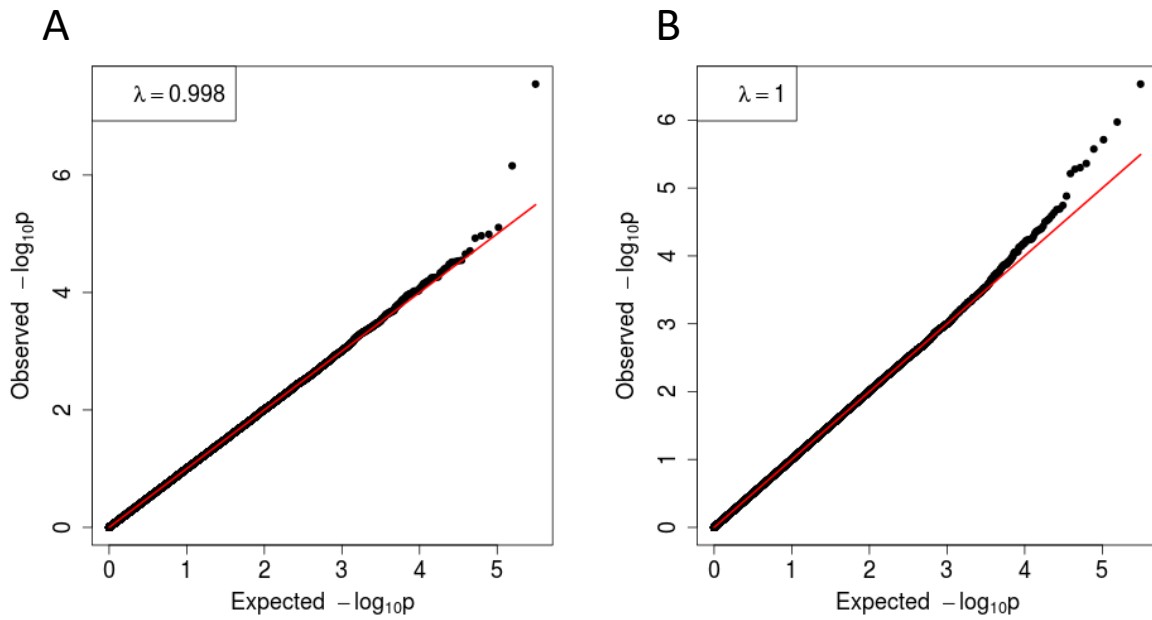

**Figure S2.** Quantile-quantile plot of GWAS p-values for genotyped data for (A) Phase 1; and (B) Phase 2 of the study.

## Figure S3

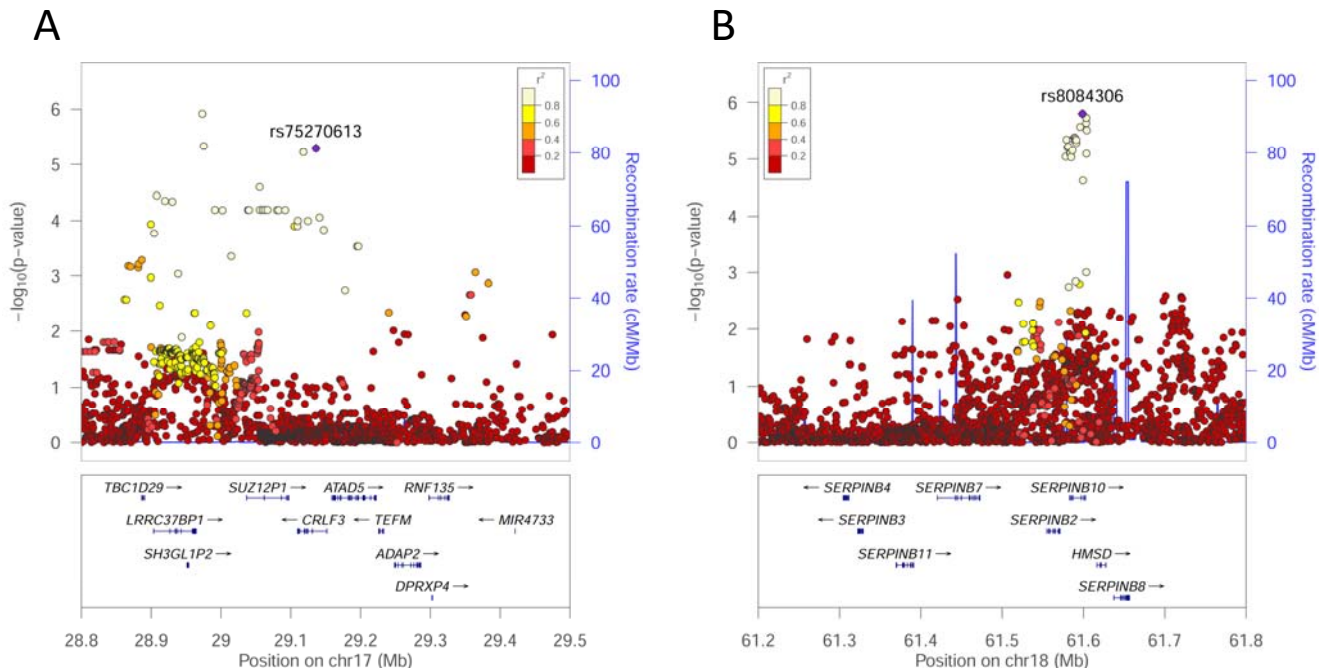

**Figure S3.** Regional association plots (LocusZoom<sup>1</sup> of the signal for CL association in the regions of (A) *CRLF3* on Chromosome 17; and (B) *SERPINB10* on Chromosome 18. The  $-\log_{10}$  P-values are shown on the upper part of each plot. Dots representing individual SNVs are color coded (see key) based on their population-specific linkage disequilibrium  $r^2$  with the top SNV (annotated by rs ID) in the region. The right Y-axis is for recombination rate (blue line), based on HapMap data. The bottom section of each plot shows the positions of genes across the region.

<sup>1</sup> Pruim RJ, Welch RP, Sanna S, et al. LocusZoom: regional visualization of genome-wide association scan results. *Bioinformatics* **2010**; 26:2336-7.

## Figure S4

### LAMP3

GSE55664 / GPL10558 / ILMN\_2170814

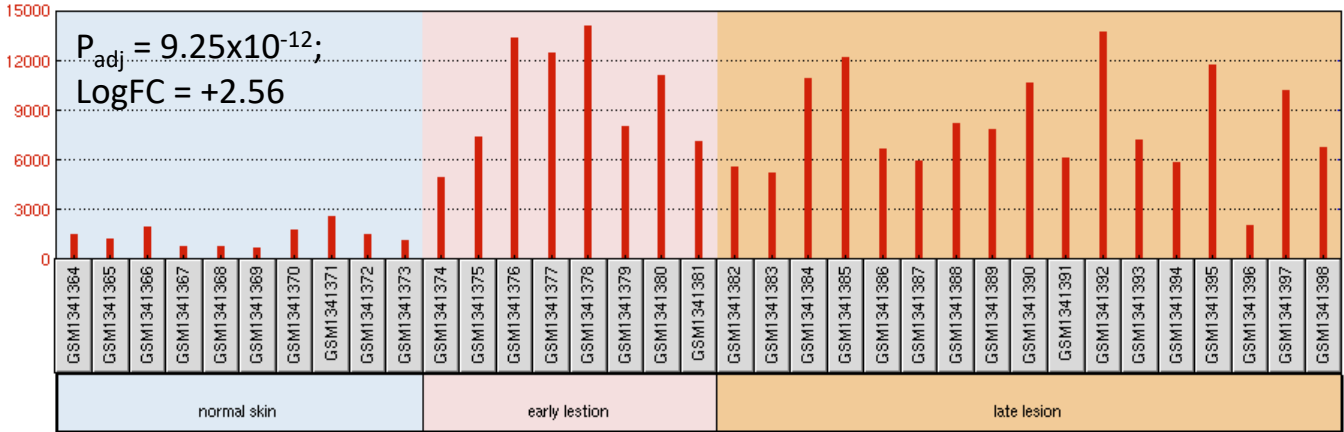

### STX7

GSE55664 / GPL10558 / ILMN\_1792518

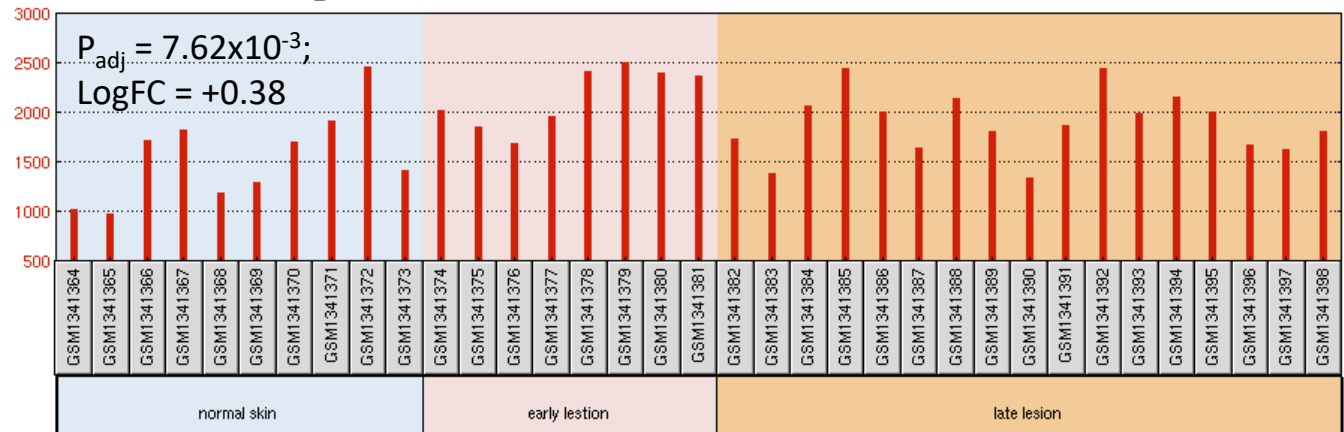

### KRT80

GSE55664 / GPL10558 / ILMN\_2366445

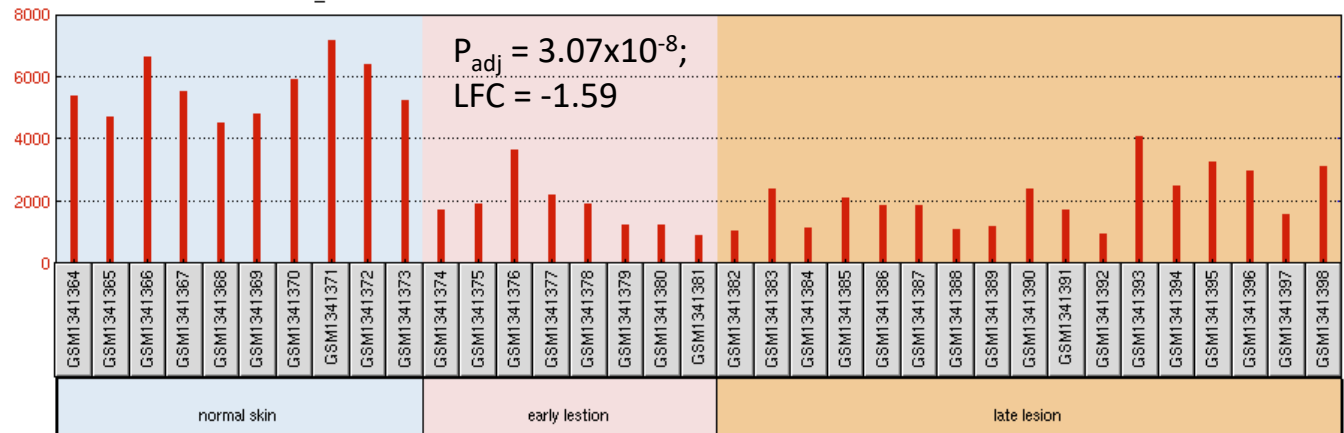

.../Figure S4 cont.

## Figure S4

### *CRLF3*

GSE55664 / GPL10558 / ILMN\_2155228

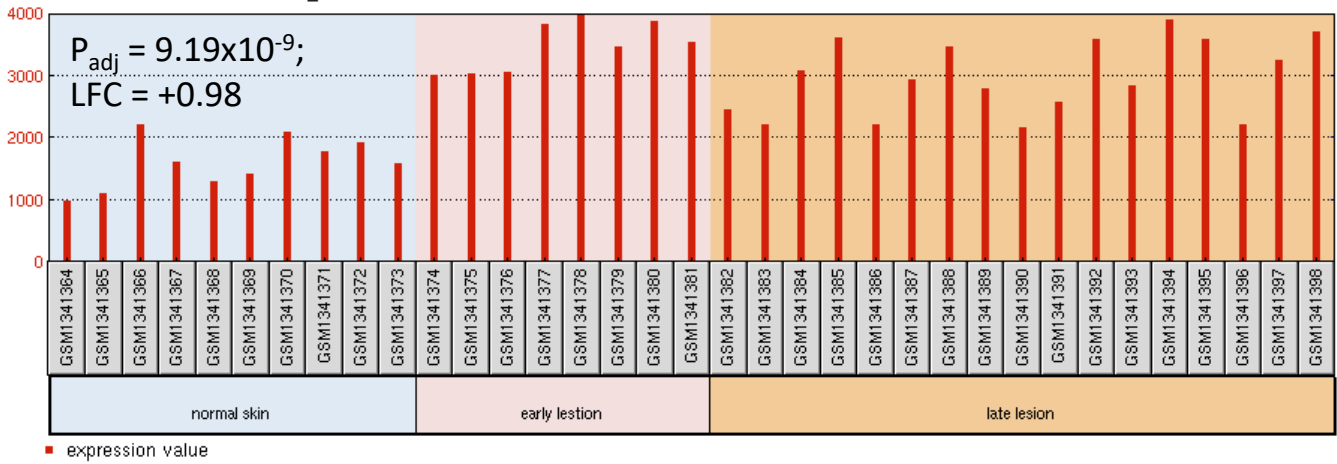

### *SERPINB10*

GSE55664 / GPL10558 / ILMN\_2147424

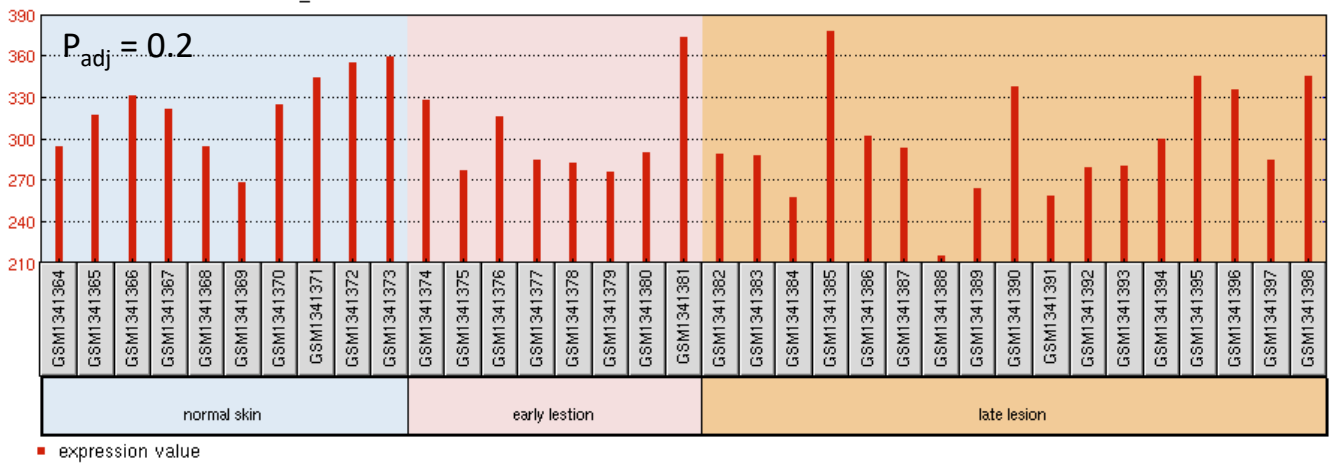

**Figure S4.** Expression of novel candidate genes derived from the GWAS data in RNA from biopsies of normal skin from healthy donors compared to biopsies from lesions of CL patients. Data were accessed from the GEO database: GSE55664.<sup>1</sup> Between group comparisons (normal versus lesions) were made on log transformed data using the GEO2R tool within the GEO database, with P-values adjusted using the Benjamini and Hochberg false discovery rate.

<sup>1</sup> Novais FO, Carvalho LP, Passos S, et al. Genomic profiling of human *Leishmania braziliensis* lesions identifies transcriptional modules associated with cutaneous immunopathology. *J Invest Dermatol* **2015**; 135:94-101.
